# Supplementary material for: Pride, Love, and Twitter Rants: Combining Machine Learning and Qualitative Techniques to Understand What Our Tweets Reveal about Race in the US
Source: PubMed Central journal article supplement (PMC6571562; doi:10.3390/ijerph16101766), 2019-05-18
Supplement: ijerph-16-01766-s001.pdf [file ijerph-16-01766-s001.pdf]

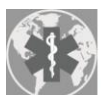

Supplementary Materials

# Pride, Love & Twitter Rants: combining machine learning and qualitative techniques to understand what our tweets reveal about race in the US.

Thu T. Nguyen, Shaniece Criss, Amani M. Allen, M. Maria Glymour, Lynn Phan, Ryan Trevino, Shrikha Dasari and Quynh C. Nguyen

**Table S1.** Race terms used in Twitter data Collection.

| Items             | Race            |
|-------------------|-----------------|
| afghanistan       | Middle Eastern  |
| afghanistani      | Middle Eastern  |
| afghans           | Middle Eastern  |
| african american  | Black           |
| african americans | Black           |
| african't         | Black           |
| africoon          | Black           |
| afro caribbean    | Black           |
| afro-caribbean    | Black           |
| aid refugees      | refugees        |
| alaska native     | Alaskan Native  |
| american indian   | Native American |
| apache indian     | Native American |
| apache nation     | Native American |
| apache tribe      | Native American |
| arab              | Middle Eastern  |
| arabs             | Middle Eastern  |
| arabic            | Middle Eastern  |
| arabush           | Arab            |
| <b>asian</b>      | Asian           |
| asians            | Asian           |
| asian indian      | Asian           |
| bahamian          | Black           |
| bahamians         | Black           |
| bamboo coon       | Asian           |
| ban islam         | anti-islamic    |
| ban muslim        | anti-islamic    |
| ban on mulsims    | anti-islamic    |
| bangalees         | Asian           |
| bangladeshi       | Asian           |
| banislam          | anti-islamic    |
| banjo lip         | Black           |
| banmuslim         | anti-islamic    |
| banonmulsims      | anti-islamic    |
| bantu             | Black           |
| beaner            | Mexican         |
| beaner shnitzel   | Multi-race      |
| beanershnitzel    | Multi-race      |
| bengalis          | Asian           |
| bhutanese         | Asian           |
| biscuit lip       | Black           |
| bix nood          | Black           |

|                     |                 |
|---------------------|-----------------|
| black boy           | Black           |
| black boys          | Black           |
| black female        | Black           |
| black girl          | Black           |
| black girls         | Black           |
| black male          | Black           |
| black men           | Black           |
| black women         | Black           |
| blacks              | Black           |
| bootlip             | Black           |
| borde jumper        | Hispanic        |
| border bandit       | Hispanic        |
| border control      | immigrant       |
| border fence        | immigrant       |
| border hopper       | Hispanic        |
| border nigger       | Hispanic        |
| border security     | immigrant       |
| border surveillance | immigrant       |
| border wall         | immigrant       |
| bow bender          | Native American |
| brazilians          | Hispanic        |
| buffalo jockey      | Native American |
| build a wall        | immigrant       |
| buildawall          | immigrant       |
| bumper lip          | Black           |
| burmese             | Asian           |
| burnt cracker       | Black           |
| burundi             | Black           |
| bush-boogie         | Black           |
| bushnigger          | Native American |
| cairo coon          | Middle Eastern  |
| cambodian           | Asian           |
| cambodians          | Asian           |
| camel cowboy        | Middle Eastern  |
| camel fucker        | Middle Eastern  |
| camel jacker        | Middle Eastern  |
| camelfucker         | Middle Eastern  |
| camel-fucker        | Middle Eastern  |
| cameljacker         | Middle Eastern  |
| camel-jacker        | Middle Eastern  |
| carpet pilot        | Middle Eastern  |
| carpetpilot         | anti-islamic    |
| carribbean people   | Black           |
| caublasian          | Multi-race      |
| central american    | Hispanic        |
| chain dragger       | Black           |
| chamorro            | Asian           |
| cherokee indian     | Native American |
| cherokee nation     | Native American |
| cherokee tribe      | Native American |
| cherry nigger       | Native American |
| chexican            | Multi-race      |
| chicano             | Hispanic        |
| chicanos            | Hispanic        |
| chiegro             | Asian           |
| chinaman            | Asian           |
| <b>chinese</b>      | Asian           |
| ching-chong         | Asian           |

---

|                  |                 |
|------------------|-----------------|
| chink            | Asian           |
| chinks           | Asian           |
| chippewa indian  | Native American |
| chippewa nation  | Native American |
| chippewa tribe   | Native American |
| choctaw indian   | Native American |
| choctaw nation   | Native American |
| choctaw tribe    | Native American |
| clit chopper     | Middle Eastern  |
| clit-chopper     | Middle Eastern  |
| clitless         | Middle Eastern  |
| clit-swiper      | Middle Eastern  |
| coconut nigger   | Asian           |
| colombian        | Hispanic        |
| columbians       | Hispanic        |
| congo lip        | Black           |
| congolese        | Black           |
| coonass          | Black           |
| coon-ass         | Black           |
| coontang         | Black           |
| costa rican      | Hispanic        |
| cracker jap      | Asian           |
| <b>cuban</b>     | Hispanic        |
| cubans           | Hispanic        |
| dampback         | Hispanic        |
| darkey           | Black           |
| darkie           | Black           |
| darky            | Black           |
| deport           | immigrant       |
| deportation      | immigrant       |
| deported         | immigrant       |
| deporting        | immigrant       |
| deports          | immigrant       |
| derka derka      | anti-islamic    |
| derkaderka       | anti-islamic    |
| diaper head      | Middle Eastern  |
| diaperhead       | Middle Eastern  |
| diaper-head      | Middle Eastern  |
| dog muncher      | Asian           |
| dog-muncher      | Asian           |
| <b>dominican</b> | Hispanic        |
| dominicans       | Hispanic        |
| dothead          | South Asians    |
| dune coon        | Middle Eastern  |
| dune nigger      | anti-islamic    |
| dunecoan         | anti-islamic    |
| dunenigger       | anti-islamic    |
| durka durka      | Middle Eastern  |
| durka-durka      | Middle Eastern  |
| east asian       | Asian           |
| ecuadorian       | Hispanic        |
| egyptian         | Black           |
| egyptians        | Black           |
| end sanctuary    | immigrant       |
| ethiopian        | Black           |
| ethiopians       | Black           |
| fence fairy      | Hispanic        |
| fence hopper     | Hispanic        |

---

|                     |                 |
|---------------------|-----------------|
| fence-hopper        | Hispanic        |
| fesskin             | Hispanic        |
| field nigger        | Black           |
| filipino            | Asian           |
| filipinos           | Asian           |
| finger nail rancher | Asian           |
| fob                 | Asian           |
| fuckmuslims         | anti-islamic    |
| ghanaian            | Black           |
| <b>ghetto</b>       | Black           |
| go back where       | immigrant       |
| gobackwhere         | immigrant       |
| golliwog            | Black           |
| gook                | Asian           |
| gookaniese          | Asian           |
| gookemon            | Asian           |
| gooky               | Asian           |
| groid               | Black           |
| guamanian           | Asian           |
| guatemalans         | Hispanic        |
| haitian             | Black           |
| haitians            | Black           |
| half breed          | Multi-race      |
| half cast           | Multi-race      |
| half-breed          | Multi-race      |
| half-cast           | Multi-race      |
| hatchet-packer      | Native American |
| help refugees       | refugees        |
| hijab               | anti-islamic    |
| hijabs              | anti-islamic    |
| hindu               |                 |
| hindus              |                 |
| hispandex           | Hispanic        |
| hispanic            | Hispanic        |
| hispanics           | Hispanic        |
| house nigger        | Black           |
| illegal alien       | immigrant       |
| illegal aliens      | immigrant       |
| illegal immigrant   | immigrant       |
| illegal immigrants  | immigrant       |
| immigrant           | immigrant       |
| immigrants          | immigrant       |
| immigration         | immigrant       |
| <b>indian</b>       |                 |
| indonesian          | Asian           |
| iranian             | Middle Eastern  |
| iraqi               | Middle Eastern  |
| iroquois indian     | Native American |
| iroquois nation     | Native American |
| iroquois tribe      | Native American |
| <b>islam</b>        | Middle Eastern  |
| islamic             | Middle Eastern  |
| israeli             | Middle Eastern  |
| israelis            | Middle Eastern  |
| jamaican            | Black           |
| jamaicans           | Black           |
| <b>japanese</b>     | Asian           |
| <b>jewish</b>       |                 |

---

|                  |                 |
|------------------|-----------------|
| jews             |                 |
| jig-abdul        | anti-islamic    |
| jigaboo          | Black           |
| jigga            | Black           |
| jiggabo          | Black           |
| jihad            | Middle Eastern  |
| jihads           | Middle Eastern  |
| jihadi           | Middle Eastern  |
| jihadis          | Middle Eastern  |
| jordanian        | Black           |
| kafeir           | anti-islamic    |
| karen people     | Asian           |
| kenyan           | Black           |
| knuckle-dragger  | Black           |
| <b>korean</b>    | Asian           |
| koreans          | Asian           |
| kuffar           | anti-islamic    |
| laotian          | Asian           |
| latin american   | Hispanic        |
| latina           | Hispanic        |
| latinas          | Hispanic        |
| <b>latino</b>    | Hispanic        |
| latinos          | Hispanic        |
| lebanese         | Middle East     |
| liberian         | Black           |
| little hiroshima | Asian           |
| malayali         | Asian           |
| malaysian        | Asian           |
| mexcrement       | Hispanic        |
| <b>mexican</b>   | Hispanic        |
| mexicans         | Hispanic        |
| mexican't        | Hispanic        |
| mexico border    | immigrant       |
| mexicoborder     | immigrant       |
| mexicoon         | Multi-race      |
| mexihos          | Hispanic        |
| middle eastern   | Middle Eastern  |
| mongolian        | Asian           |
| mongolians       | Asian           |
| moroccan         | Black           |
| moroccans        | Black           |
| mozambican       | Black           |
| mud people       | Black           |
| mudshark         | anti-islamic    |
| <b>muslim</b>    | Middle Eastern  |
| muslimban        | Middle Eastern  |
| muslims          | Middle Eastern  |
| muzrat           | anti-islamic    |
| muzzie           | Middle Eastern  |
| native american  | Native American |
| native americans | Native American |
| native hawaiian  | Native Hawaiian |
| navajo           | Native American |
| <b>negro</b>     | Black           |
| nepalese         | Asian           |
| nigerian         | Black           |
| nigerians        | Black           |
| <b>nigga</b>     | Black           |

---

|                  |                            |
|------------------|----------------------------|
| nigger           | Black                      |
| niggers          | black                      |
| nigglet          | Black                      |
| nigglets         | black                      |
| niglet           | Black                      |
| noodle nigger    | Asian                      |
| north korean     | Asian                      |
| <b>oriental</b>  | Asian                      |
| orientals        | Asian                      |
| our country back | immigrant                  |
| ourcountryback   | immigrant                  |
| pacific islander | Pacific Islander           |
| paki             | Middle eastern/south asian |
| pakistani        | Middle Eastern             |
| palestinian      | Middle Eastern             |
| panamanian       | Hispanic                   |
| paraguayan       | Hispanic                   |
| pashtun          | Middle Eastern             |
| pegida           | anti-islamic               |
| peruvian         | Hispanic                   |
| pickaninny       | Black                      |
| pisslam          | anti-islamic               |
| polynesian       | Pacific Islander           |
| porch monkey     | Black                      |
| prairie nigger   | Native American            |
| pueblo indians   | Native American            |
| pueblo nation    | Native American            |
| pueblo tribe     | Native American            |
| puerto rican     | Hispanic                   |
| puerto ricans    | Hispanic                   |
| qtip head        | anti-islamic               |
| race traitor     | Multi-race                 |
| raghead          | anti-islamic               |
| rag head         | anti-islamic               |
| rapefugee        | anti-islamic               |
| red nigger       | Native American            |
| refugee          | refugees                   |
| refugees         | refugees                   |
| resettlement     | refugees                   |
| rice burner      | Asian                      |
| rice nigger      | Asian                      |
| rice rocket      | Asian                      |
| rice-nigger      | Asian                      |
| river nigger     | Native American            |
| rivernigger      | Native American            |
| rug pilot        | Middle Eastern             |
| rugpilot         | anti-islamic               |
| rug rider        | Middle Eastern             |
| rwandan people   | Black                      |
| salvadoreans     | Hispanic                   |
| samoan           | Pacific Islander           |
| sanctuary cities | immigrant                  |
| sanctuary city   | immigrant                  |
| sanctuarycities  | immigrant                  |
| sanctuarycity    | immigrant                  |
| sand flea        | anti-islamic               |
| sand monkey      | Middle Eastern             |
| sand moolie      | anti-islamic               |

---

|                     |                        |
|---------------------|------------------------|
| sand nigger         | Middle Eastern         |
| sand rat            | anti-islamic           |
| sandflea            | anti-islamic           |
| sandmonkey          | anti-islamic           |
| sandmoolie          | anti-islamic           |
| sandnigger          | anti-islamic           |
| sandrat             | anti-islamic           |
| secure our border   | immigrant              |
| secureourborder     | immigrant              |
| shiptar             | Middle Eastern         |
| sioux indian        | Native American        |
| sioux nation        | Native American        |
| sioux tribe         | Native American        |
| slurpee nigger      | anti-islamic           |
| slurpeenigger       | anti-islamic           |
| somali              | Black                  |
| somalian            | Black                  |
| south african       | Black                  |
| south american      | Hispanic               |
| south asian         | Asian                  |
| sudanese            | Black                  |
| sun goblin          | Middle Eastern         |
| syria               | refugees               |
| syrian              | refugees               |
| syrians             | refugees               |
| syrianrefugee       | refugees               |
| taco nigger         | Hispanic               |
| taiwanese           | Asian                  |
| tanzanian           | Black                  |
| tar baby            | Black                  |
| tar-baby            | Black                  |
| teepee creeper      | Native American        |
| tee-pee creeper     | Native American        |
| <b>thai</b>         | Asian                  |
| thais               | Asian                  |
| thin eyed           | Asian                  |
| thin-eyed           | Asian                  |
| tibetan             | Asian                  |
| timber nigger       | Native American        |
| timbernigger        | Native American        |
| tomahawk chucker    | Native American        |
| tomahawk-chucker    | Native American        |
| tomahonky           | Native American        |
| towel head          | anti-islamic           |
| towelhead           | anti-islamic           |
| towel-head          | Middle Eastern         |
| undocumented        | immigrant              |
| unhcr               | refugees               |
| <b>vietnamese</b>   | Asian                  |
| we welcome refugees | refugees               |
| welcome refugee     | refugees               |
| welcomerefugee      | refugees               |
| wetback             | Hispanic               |
| whacky iraqi        | Middle Eastern         |
| whitegenocide       | anti-islamic           |
| wog                 | dark-skinned foreigner |
| zambian             | Black                  |
| zimbabwean          | Black                  |

---

|                   |         |
|-------------------|---------|
| zipperhead        | Asian   |
| @artistsandfleas  | exclude |
| negrone           | exclude |
| new mexico border | exclude |
| deportes          | exclude |
| deportiva         | exclude |
| indiana           | exclude |
| indianapolis      | exclude |

**Table S2.** Count of tweets using race-related terms by state.

| STATE | All Tweets | Black | Middle Eastern | Hispanic | Asian |
|-------|------------|-------|----------------|----------|-------|
| AL    | 15983      | 11405 | 669            | 1391     | 1990  |
| AZ    | 21158      | 7514  | 1600           | 4723     | 3784  |
| AR    | 5708       | 3680  | 179            | 968      | 704   |
| CA    | 197514     | 69001 | 9823           | 41867    | 66897 |
| CO    | 11880      | 4627  | 881            | 2406     | 3176  |
| CT    | 11618      | 7269  | 375            | 1527     | 1727  |
| DE    | 4823       | 3258  | 161            | 653      | 613   |
| DC    | 18565      | 8227  | 2513           | 3184     | 3811  |
| FL    | 98996      | 42420 | 7451           | 26184    | 19802 |
| GA    | 56952      | 38855 | 2398           | 6575     | 7239  |
| ID    | 1882       | 387   | 306            | 457      | 637   |
| IL    | 39021      | 18233 | 2611           | 7788     | 8651  |
| IN    | 13844      | 7823  | 1087           | 2435     | 2048  |
| IA    | 4074       | 1607  | 245            | 882      | 1158  |
| KS    | 5725       | 2558  | 383            | 1484     | 994   |
| KY    | 9493       | 5426  | 395            | 1326     | 1563  |
| LA    | 32354      | 27616 | 630            | 1626     | 2076  |
| ME    | 1320       | 359   | 126            | 196      | 541   |
| MD    | 33075      | 22474 | 2140           | 3261     | 4366  |
| MA    | 20457      | 9093  | 1858           | 3600     | 4840  |
| MI    | 33931      | 22473 | 2529           | 3104     | 4708  |
| MN    | 9075       | 3509  | 686            | 1941     | 2493  |
| MS    | 7573       | 6039  | 179            | 615      | 601   |
| MO    | 12248      | 6323  | 720            | 1950     | 2682  |
| MT    | 506        | 91    | 60             | 66       | 184   |
| NE    | 3143       | 1598  | 190            | 556      | 649   |
| NV    | 34063      | 6843  | 1096           | 9691     | 15800 |
| NH    | 1460       | 468   | 74             | 392      | 396   |
| NJ    | 37607      | 19262 | 2268           | 8259     | 6363  |
| NM    | 3842       | 1204  | 173            | 899      | 500   |
| NY    | 106644     | 34095 | 9138           | 23834    | 32527 |
| NC    | 37413      | 21765 | 2471           | 4204     | 6078  |
| ND    | 579        | 237   | 21             | 103      | 162   |
| OH    | 40747      | 27147 | 2023           | 4386     | 5575  |
| OK    | 9711       | 5345  | 675            | 1311     | 1515  |
| OR    | 9163       | 1898  | 890            | 1443     | 4102  |
| PA    | 41202      | 21895 | 3320           | 5149     | 9207  |
| RI    | 3145       | 1701  | 109            | 516      | 685   |
| SC    | 15416      | 10717 | 521            | 1668     | 2027  |
| SD    | 847        | 226   | 135            | 113      | 158   |
| TN    | 18288      | 10373 | 1018           | 2817     | 3256  |
| TX    | 146947     | 92486 | 5944           | 26341    | 19320 |
| UT    | 5413       | 1594  | 478            | 892      | 1769  |
| VT    | 488        | 79    | 30             | 78       | 246   |
| VA    | 32187      | 18199 | 2424           | 3446     | 6852  |
| WA    | 18979      | 6223  | 1126           | 2796     | 7934  |
| WV    | 2110       | 1063  | 139            | 311      | 510   |



|    |      |      |     |      |      |
|----|------|------|-----|------|------|
| WI | 9907 | 4575 | 866 | 1800 | 2124 |
| WY | 459  | 68   | 34  | 145  | 149  |

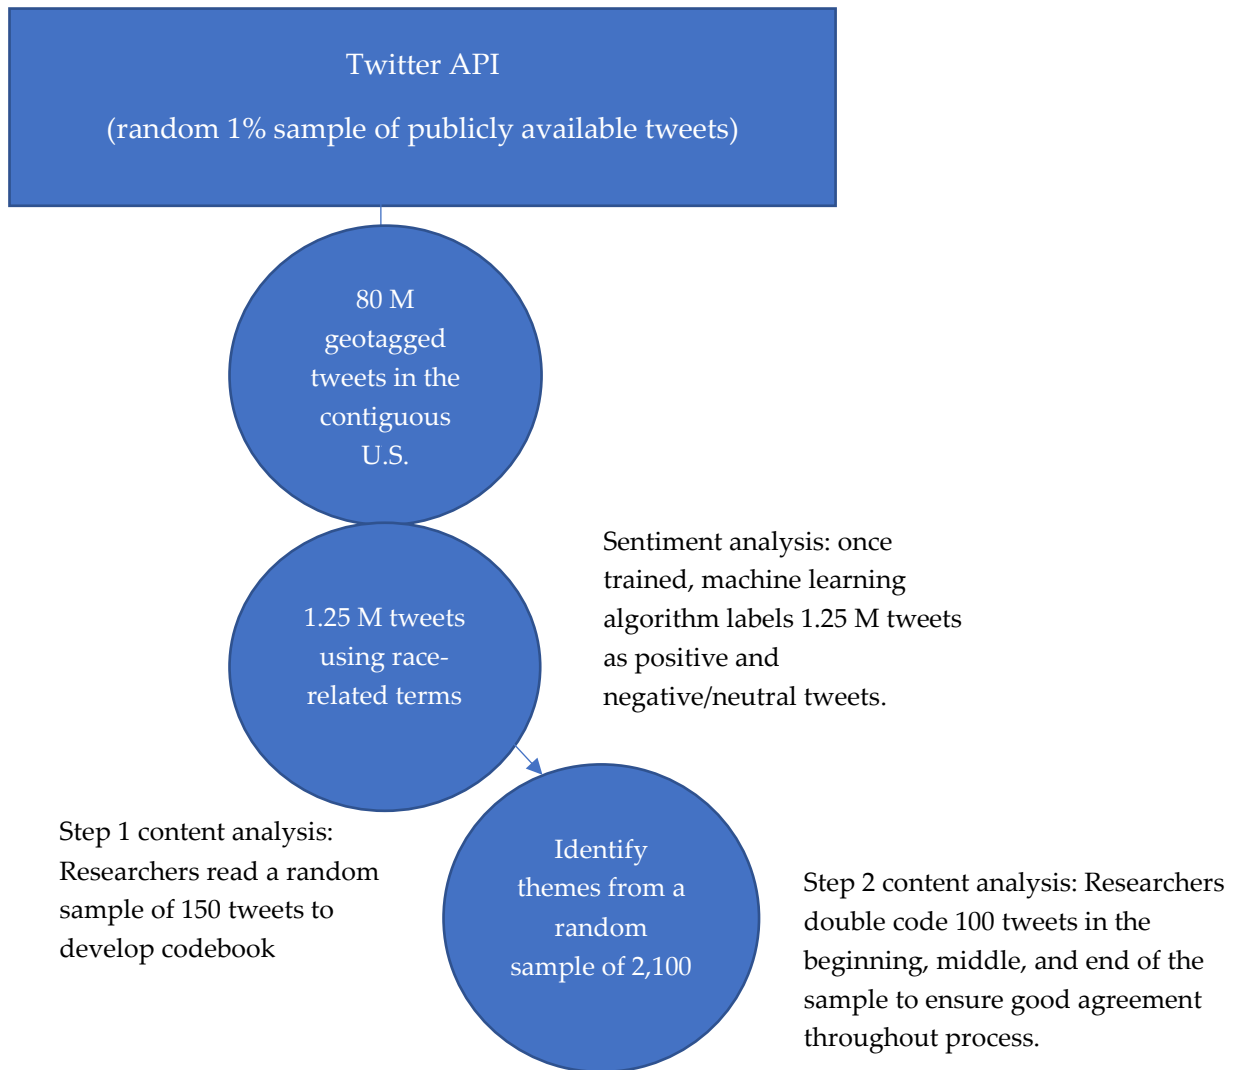

**Figure S1.** Analytic Sample and Analysis Flow Chart.

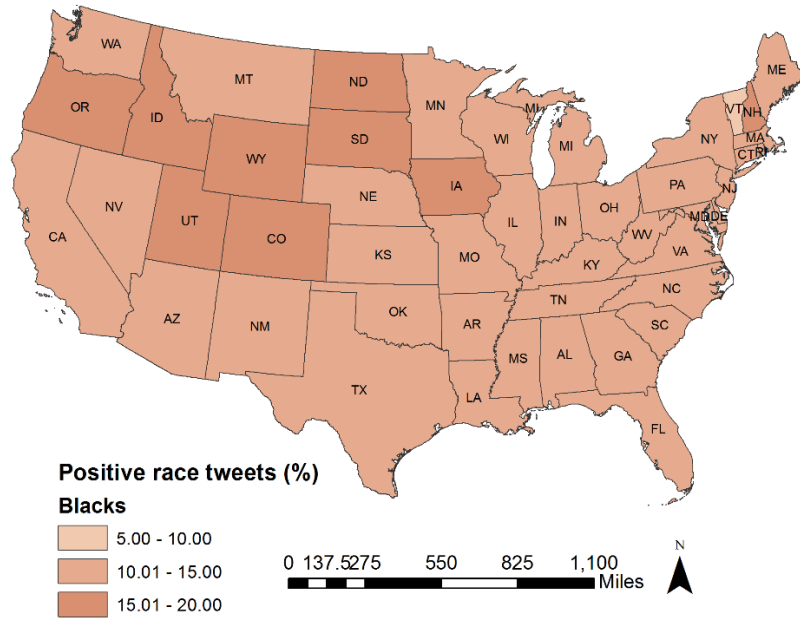

**Figure S2.** Geographic distribution of percent tweets using Black-related terms that are positive, collected April 2015-March 2016.

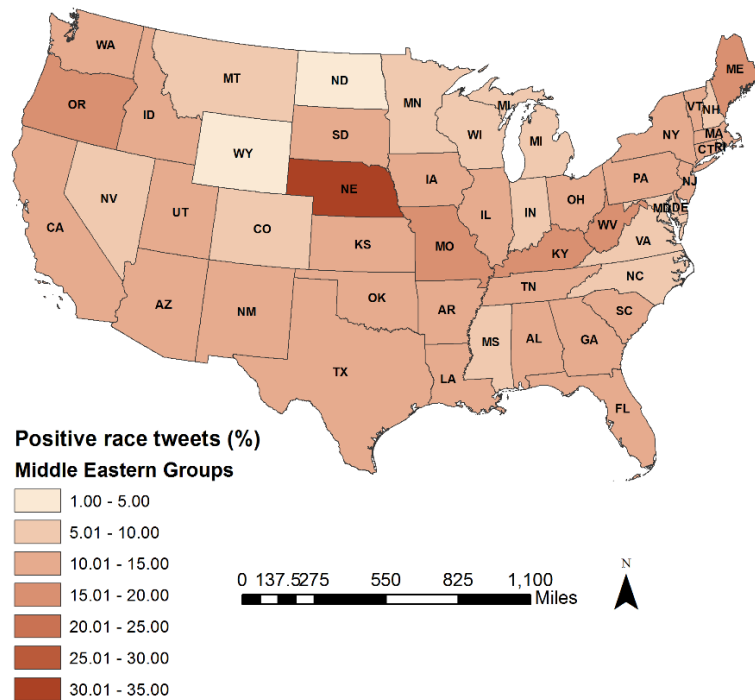

**Figure S3.** Geographic distribution of percent tweets using Middle Eastern-related terms that are positive, collected April 2015-March 2016.

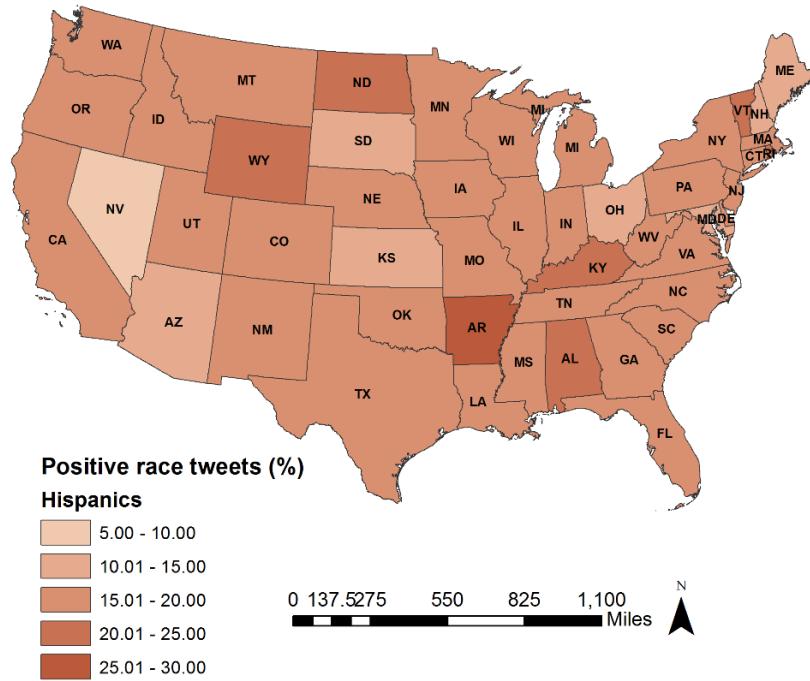

**Figure S4.** Geographic distribution of percent tweets using Hispanic-related terms that are positive, collected April 2015-March 2016.

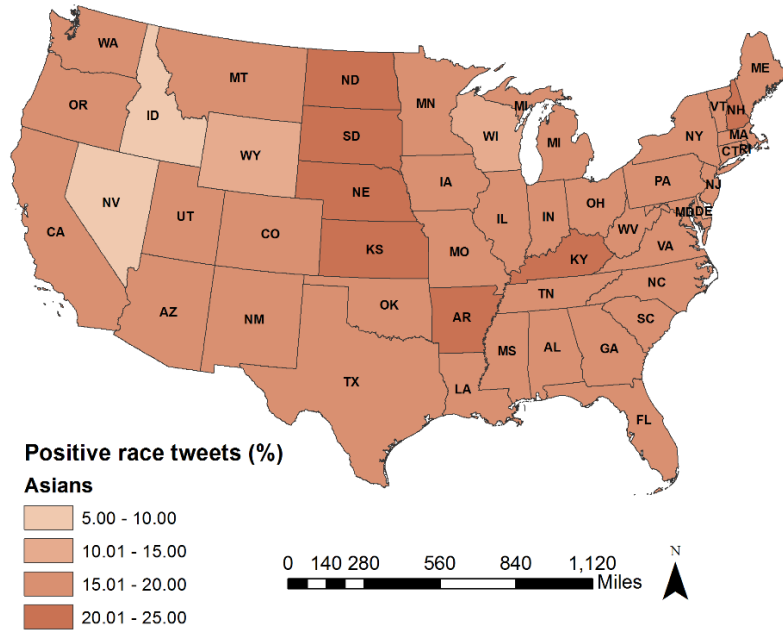

**Figure S5.** Geographic distribution of percent tweets using Asian-related terms that are positive, collected April 2015-March 2016.
